# Supplementary material for: The E3 ubiquitin ligase Cul4b promotes CD4+ T cell expansion by aiding the repair of damaged DNA
Source: PubMed Central journal article supplement (PMC7888682; doi:10.1371/journal.pbio.3001041), 2021-02-01
Supplement: pbio.3001041.s019.pdf [file pbio.3001041.s019.pdf]

Figure 1A

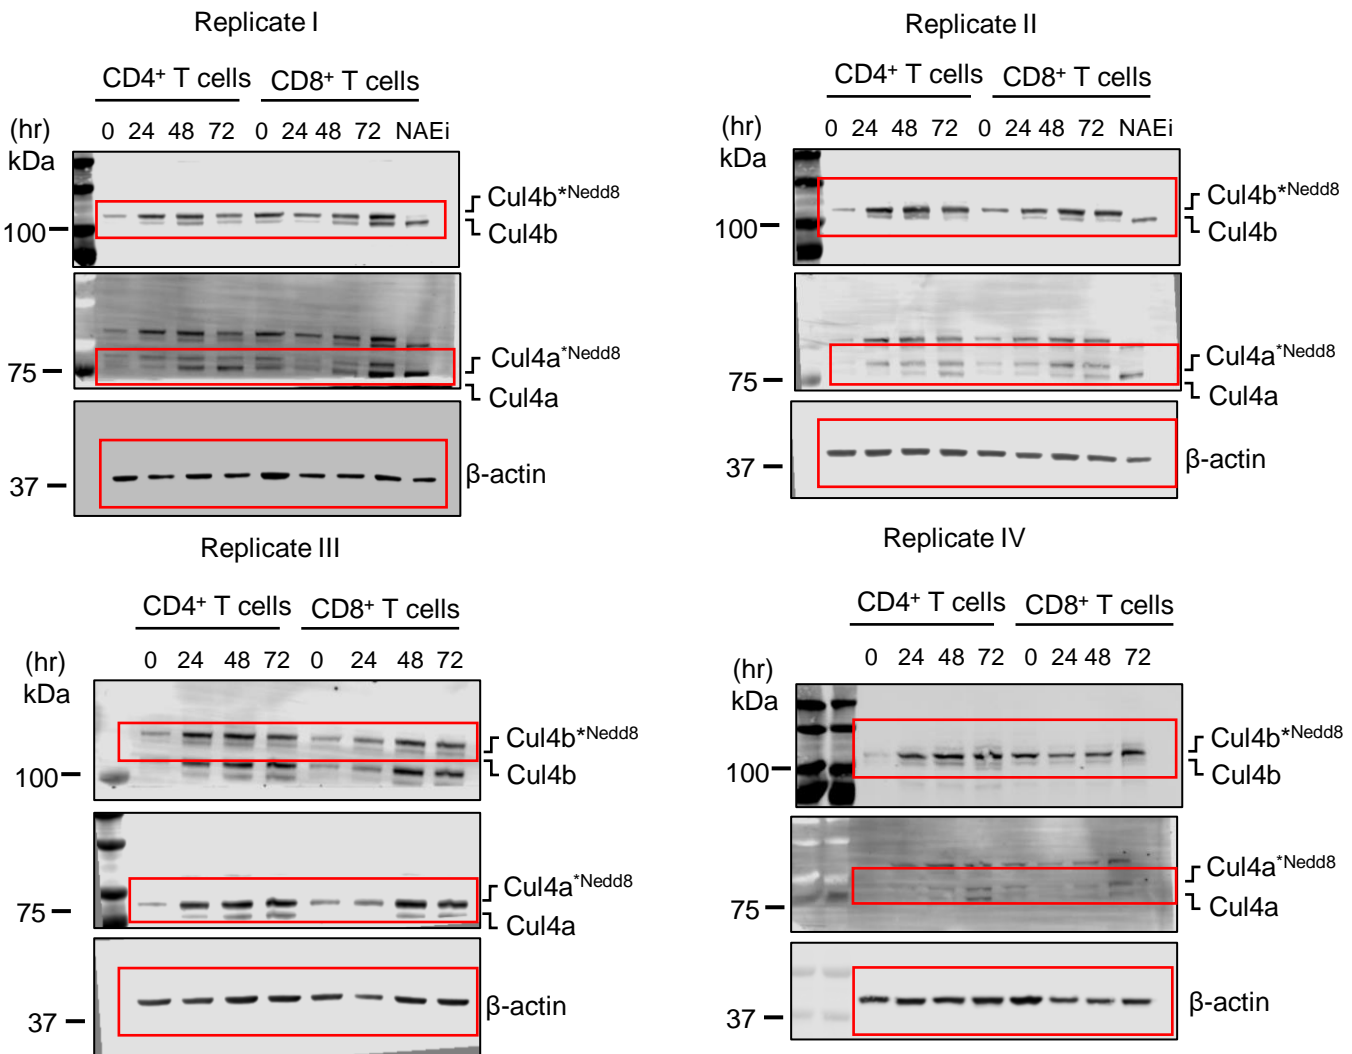

Images were acquired by li-cor odyssey infrared imaging system

Approx. molecular weight ladder (L) was indicated.

PVDF Membranes were cut for immunoblotting of more than one protein. For Cul4a and Cul4b staining blots were stained intermittently, on occasions Cul4a was probed first then Cul4b and vice versa.

Figure 2A

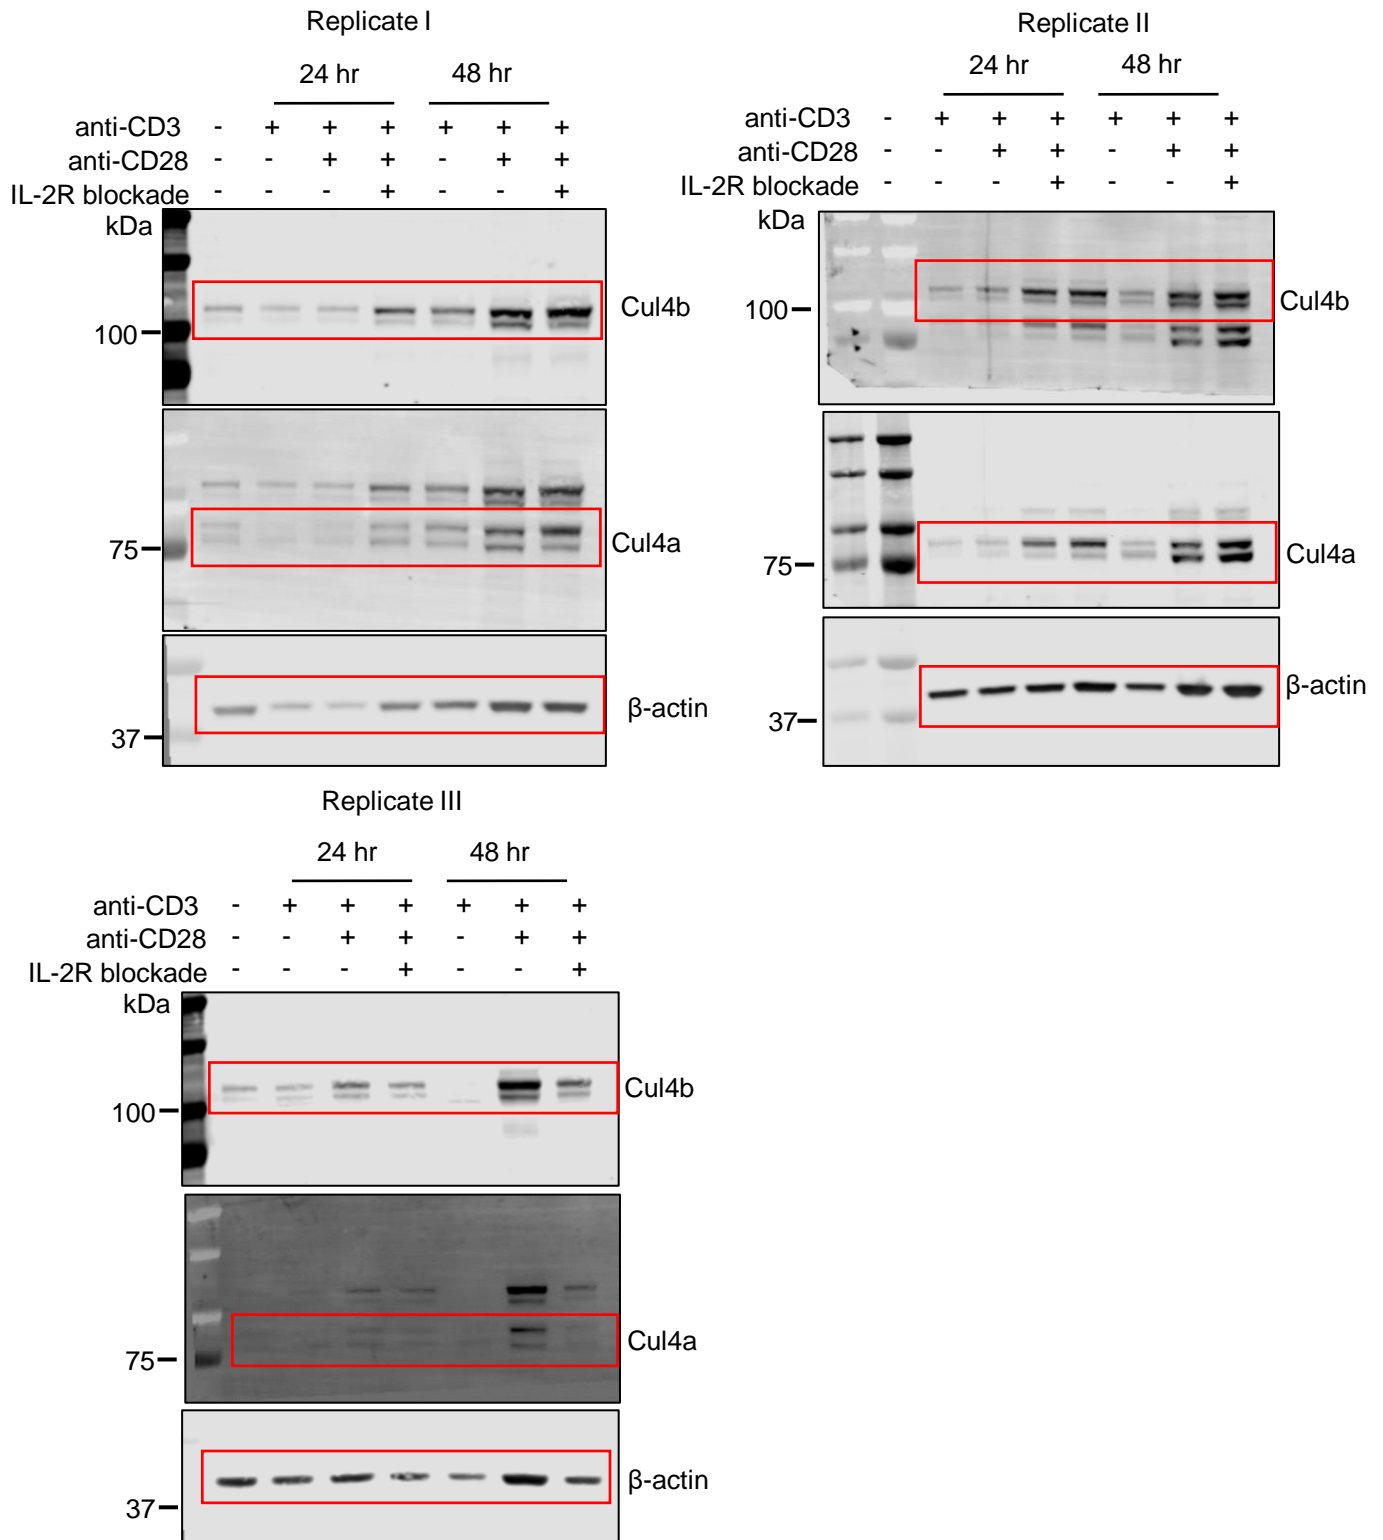

Images were acquired by li-cor odyssey infrared imaging system

Approx. molecular weight ladder (L) was indicated.

PVDF Membranes were cut for immunoblotting of more than one protein. For Cul4a and Cul4b staining blots were stained intermittently, on occasions Cul4a was probed first then Cul4b and vice versa.

Figure 2B

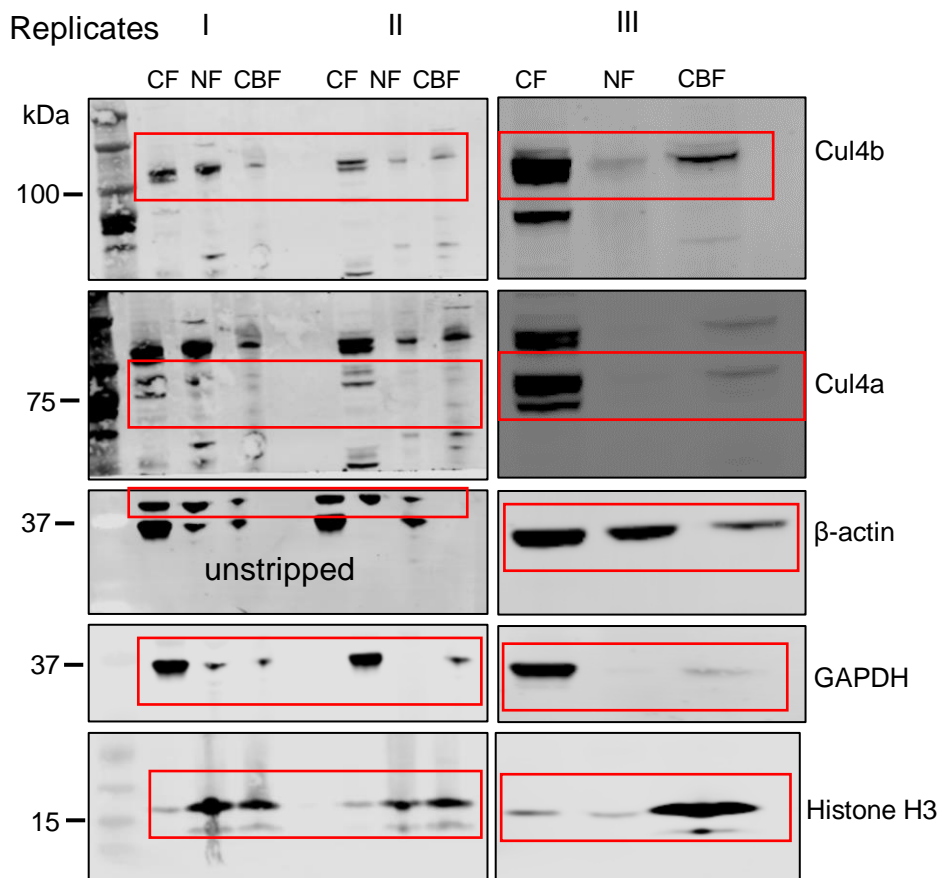

Images were acquired by li-cor odyssey infrared imaging system  
Approx. molecular weight ladder (L) was indicated.

PVDF Membranes were cut for immunoblotting of more than one protein. For Cul4a and Cul4b staining blots were stained intermittently, on occasions Cul4a was probed first then Cul4b and vice versa.

Figure 7B

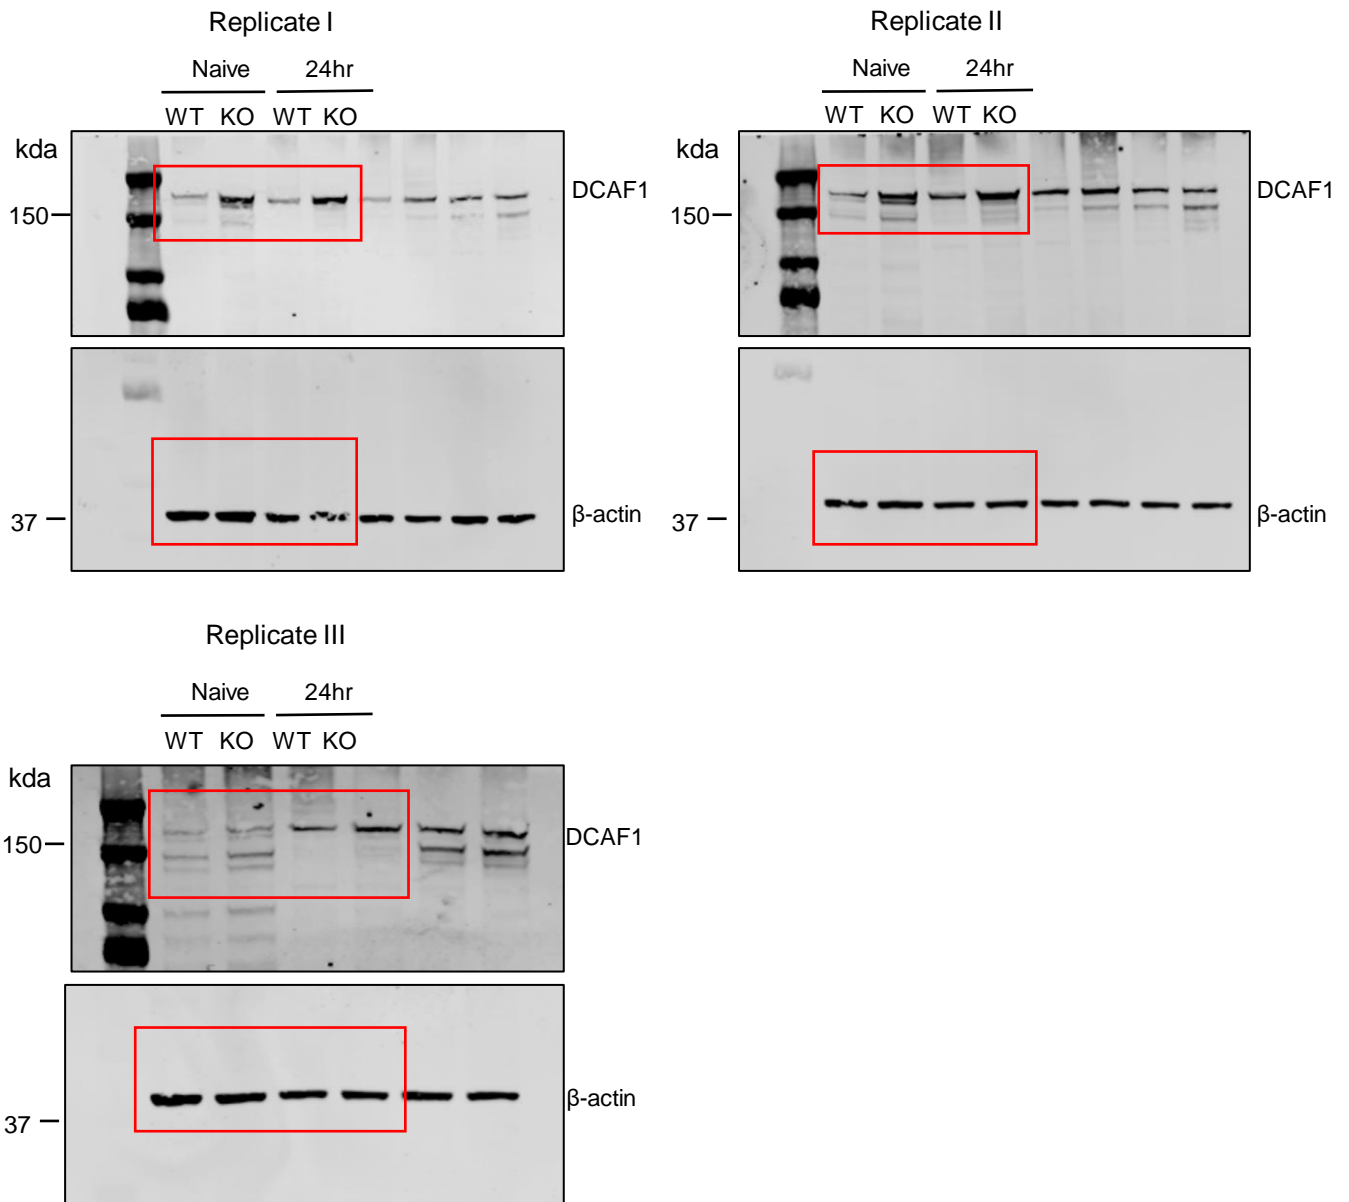

Images were acquired by li-cor odyssey infrared imaging system  
Approx. molecular weight ladder (L) was indicated.  
PVDF Membranes were cut for immunoblotting of more than one protein.

Figure 7C

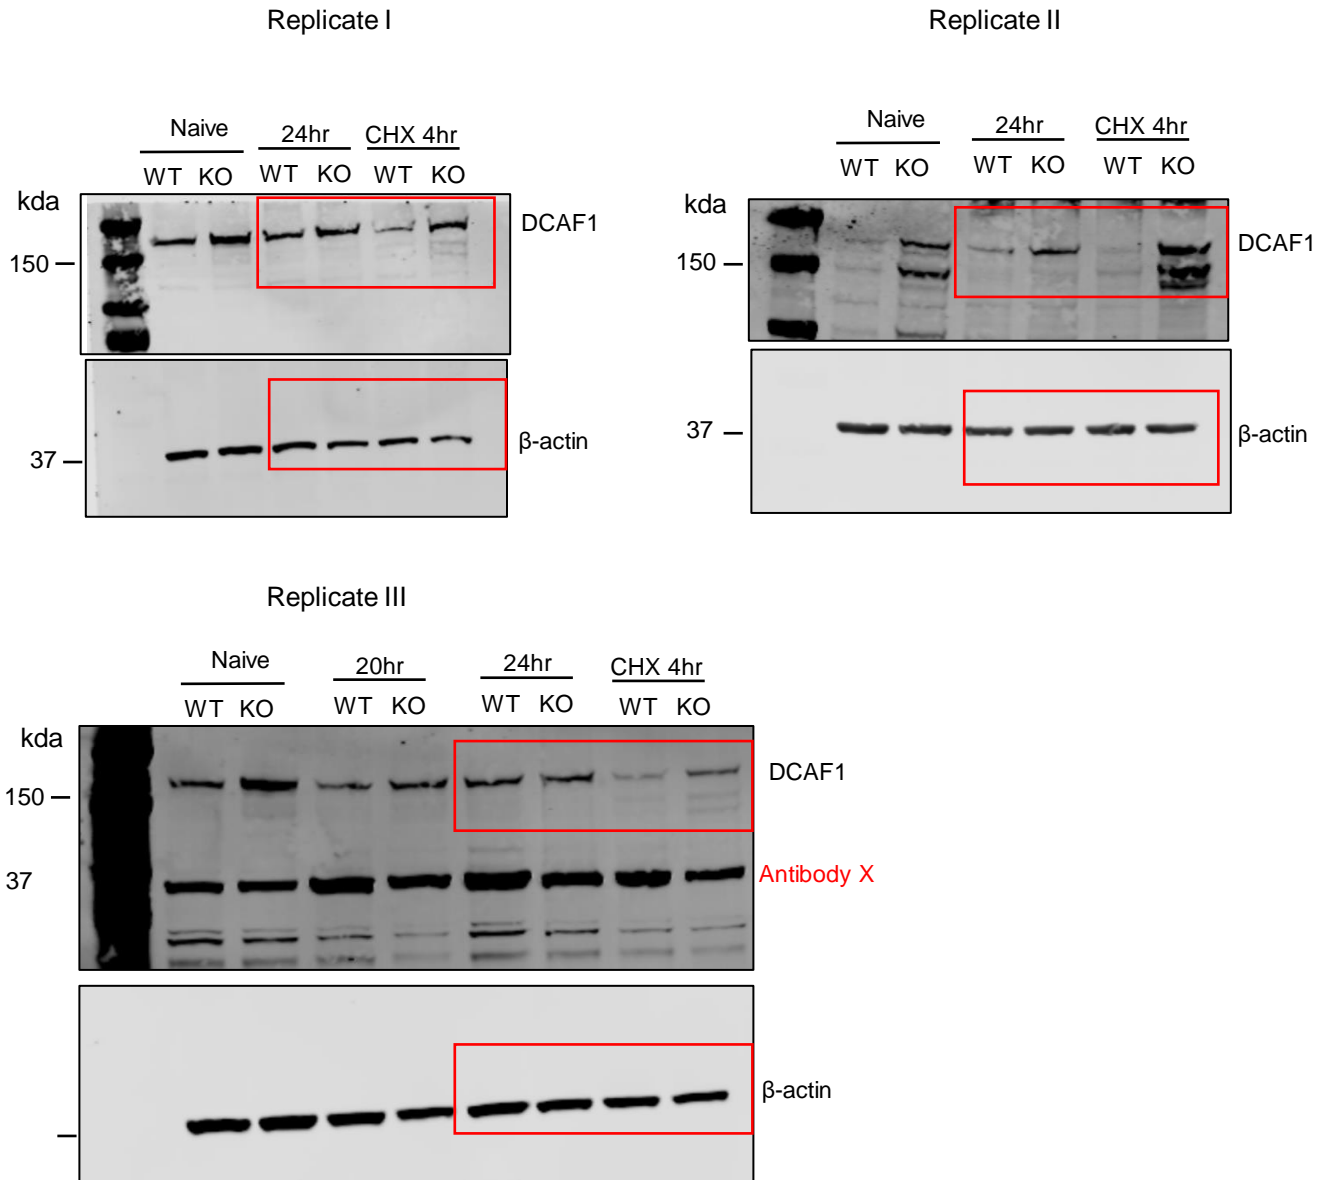

Images were acquired by li-cor odyssey infrared imaging system  
Approx. molecular weight ladder (L) was indicated.  
PVDF Membranes were cut for immunoblotting of more than one protein.

Figure 7G

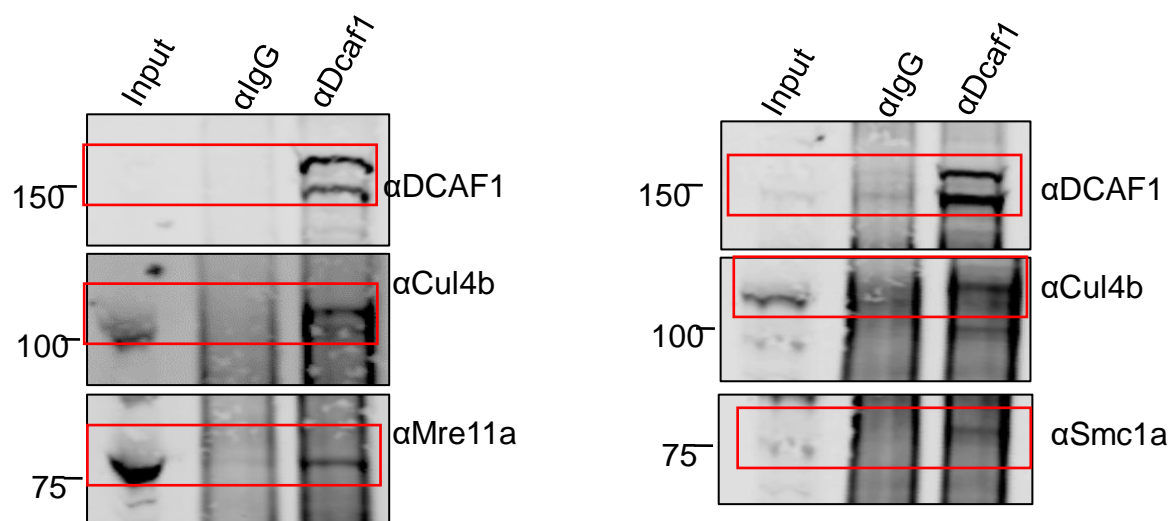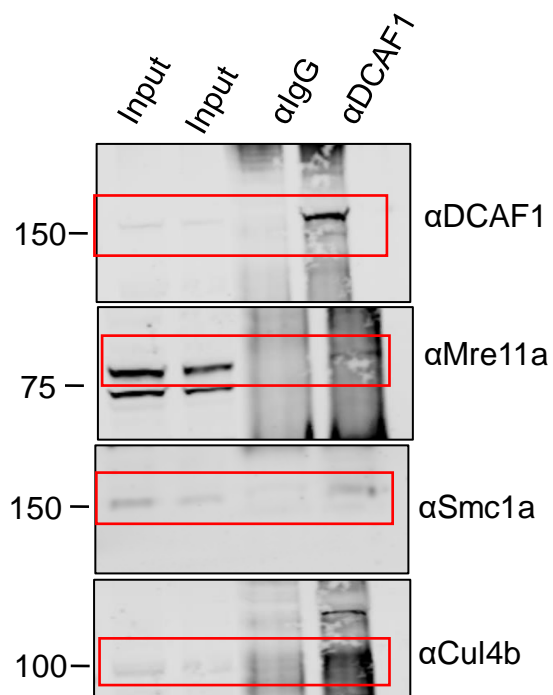

Images were acquired by li-cor odyssey infrared imaging system  
Approx. molecular weight ladder (L) was indicated.

Figure 7H

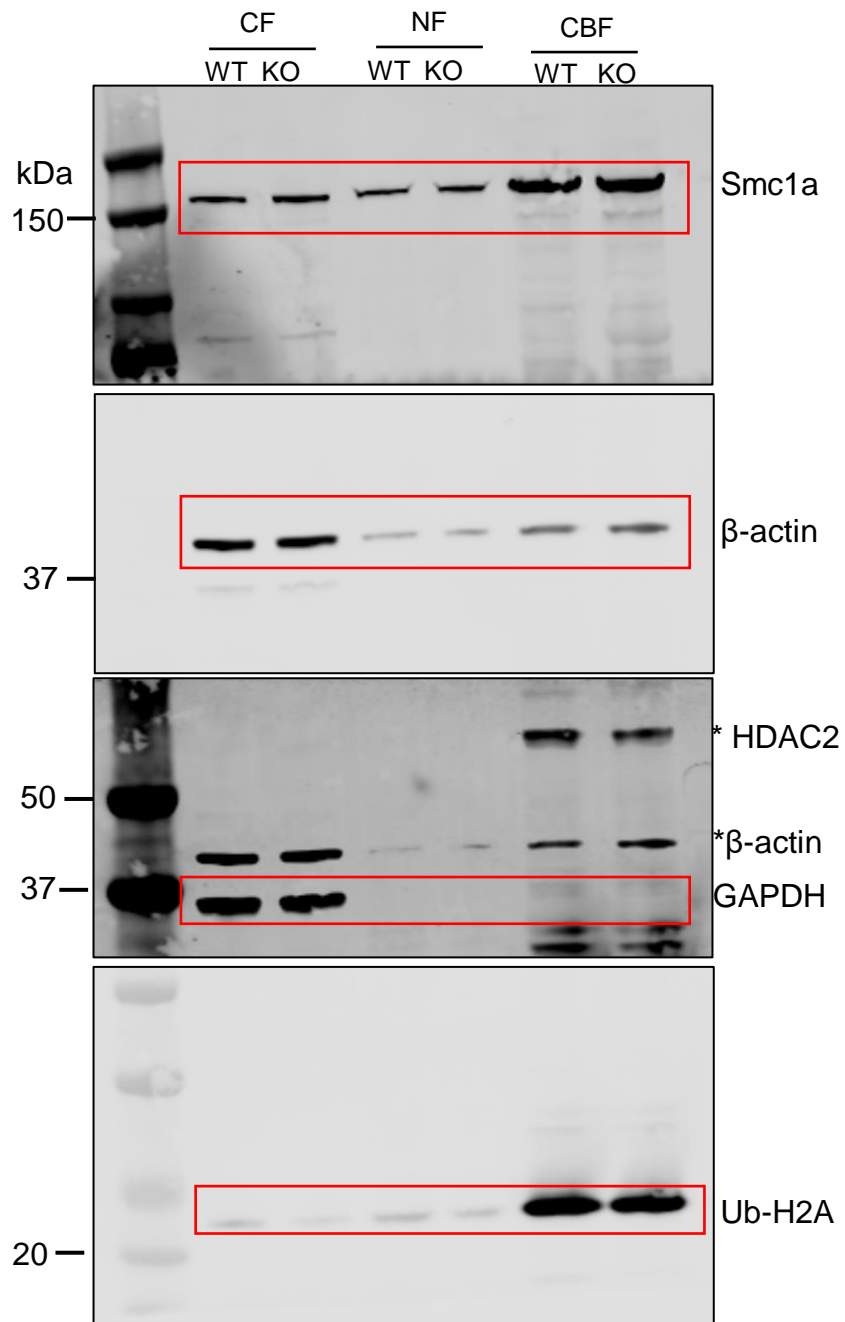

Images were acquired by li-cor odyssey infrared imaging system  
Approx. molecular weight ladder (L) was indicated.

Figure 71

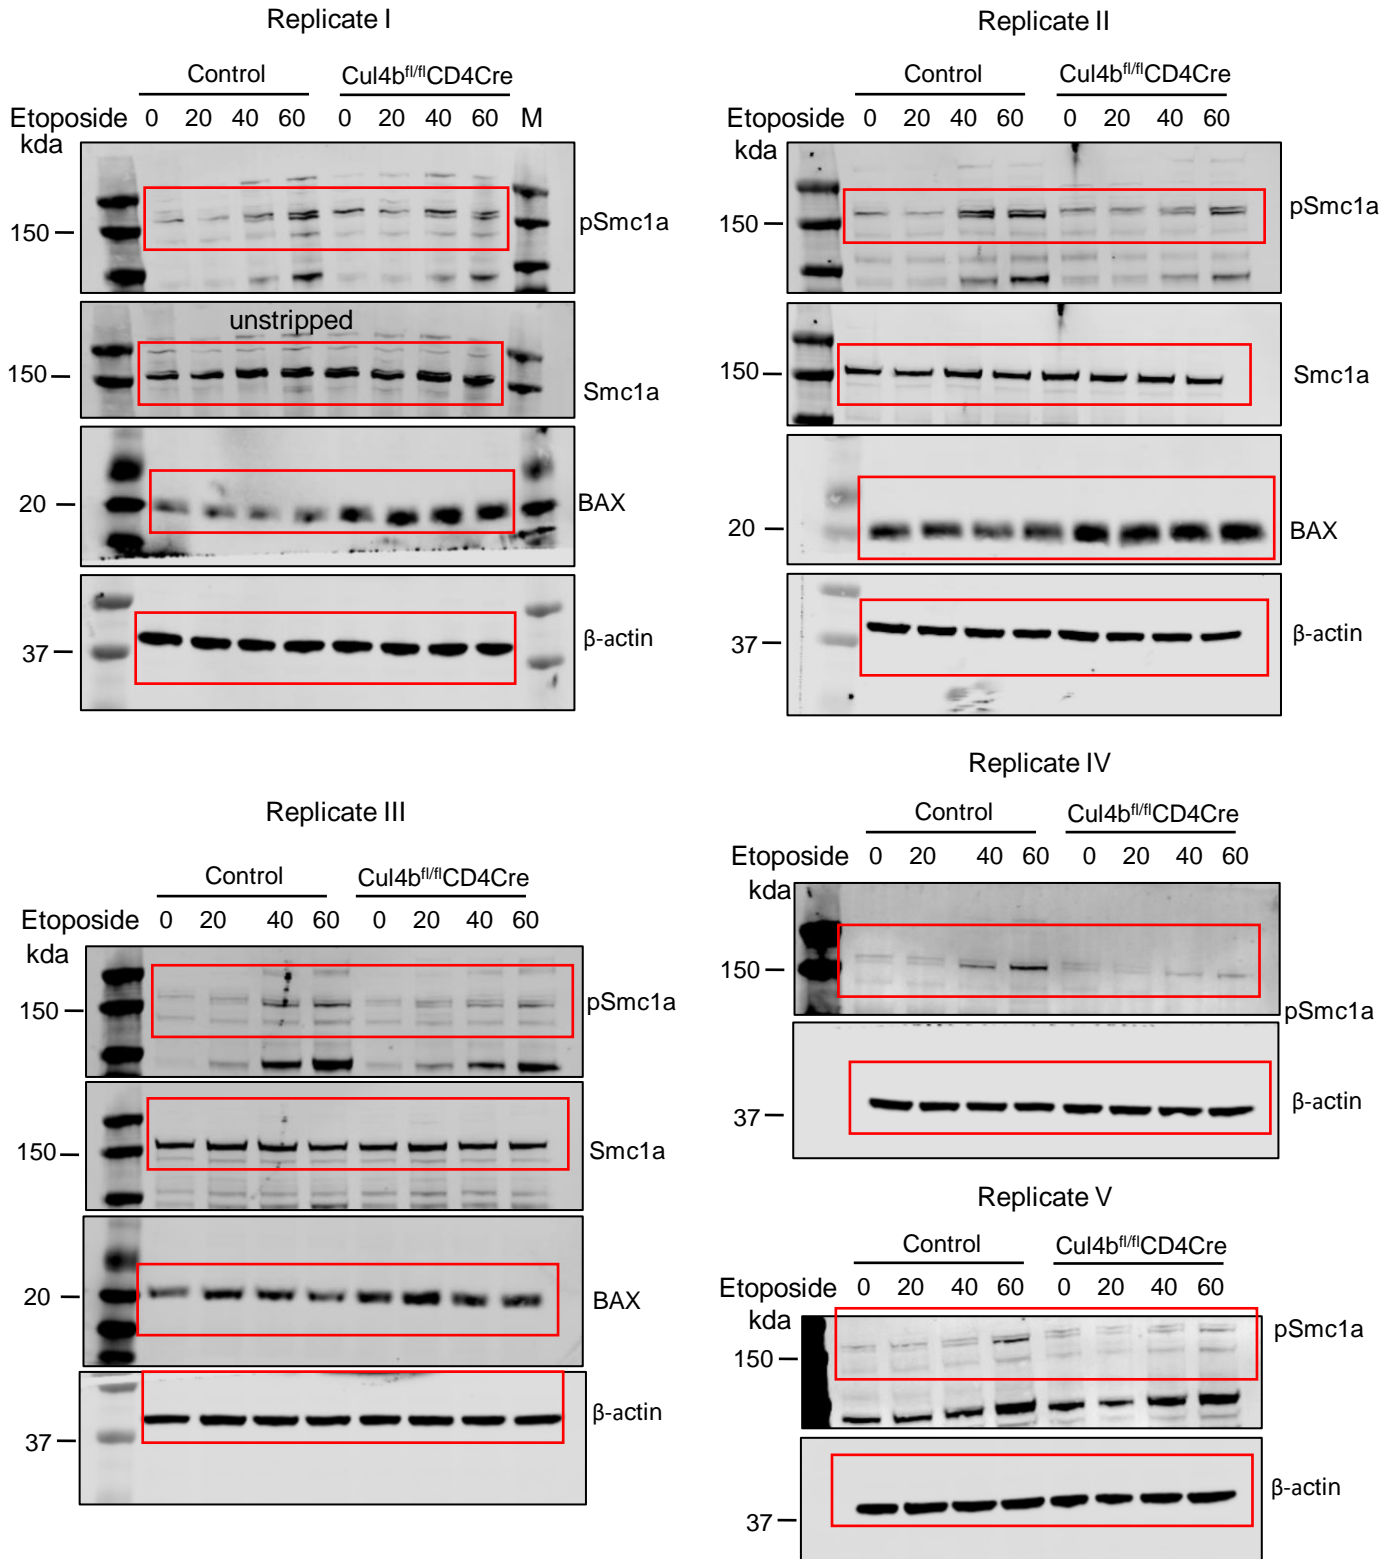

Images were acquired by li-cor odyssey infrared imaging system  
 Approx. molecular weight ladder (L) was indicated.



# Supplementary Figure 1D

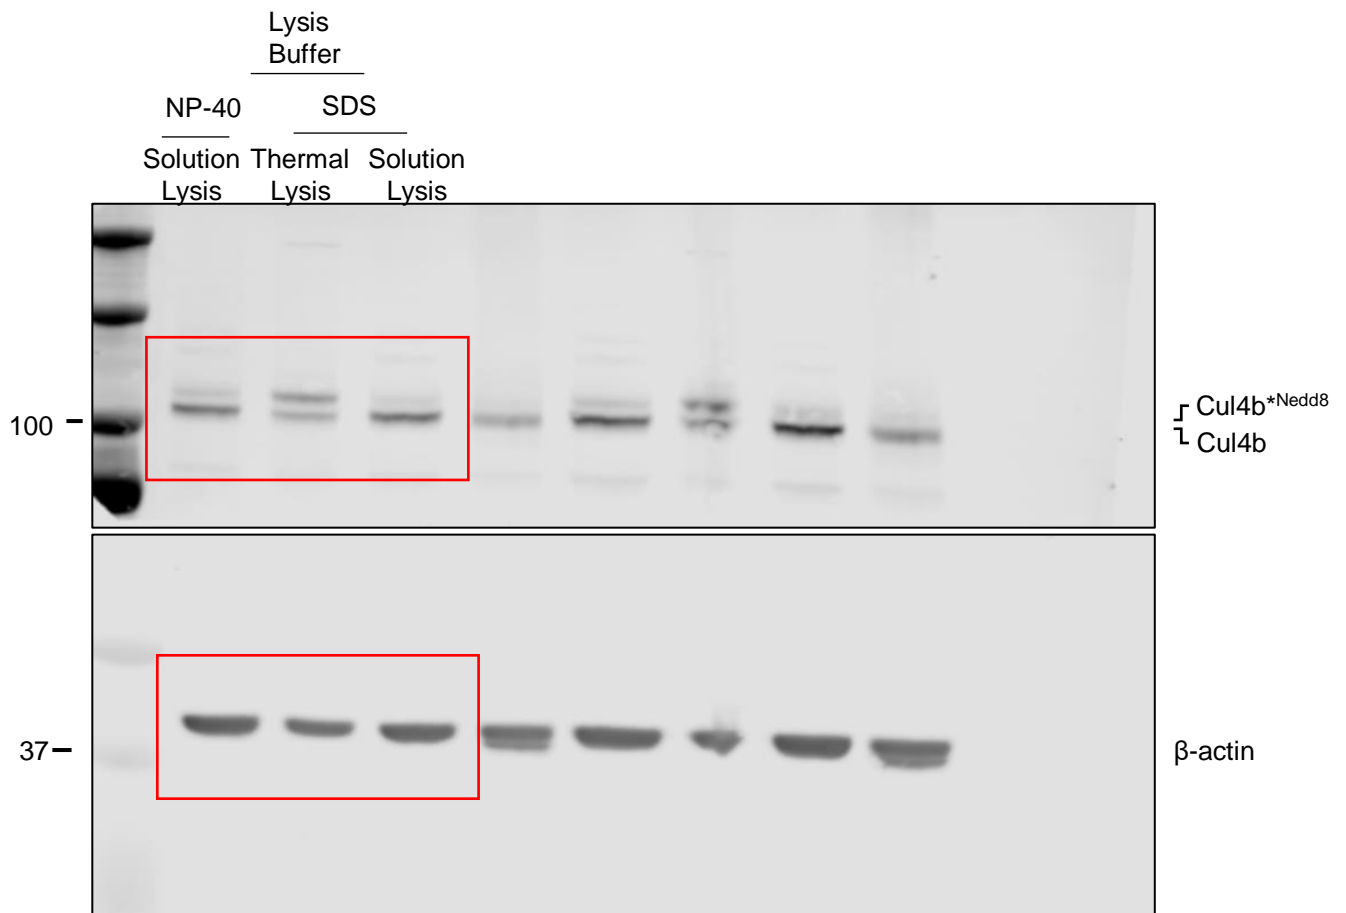

Images were acquired by li-cor odyssey infrared imaging system  
Approx. molecular weight ladder (L) was indicated.

# Supplementary Figure 7A

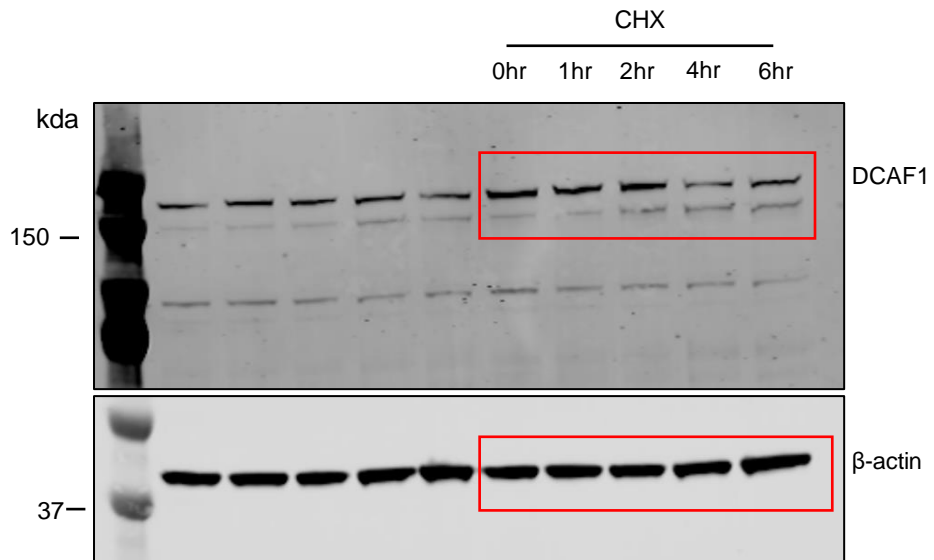

Images were acquired by li-cor odyssey infrared imaging system  
Approx. molecular weight ladder (L) was indicated.

Figure 7B

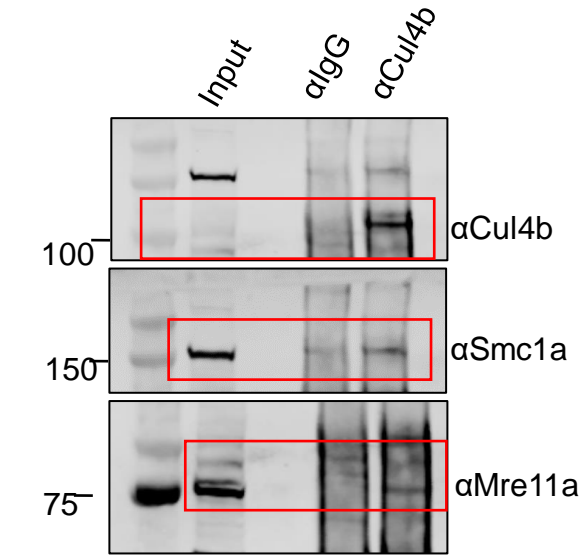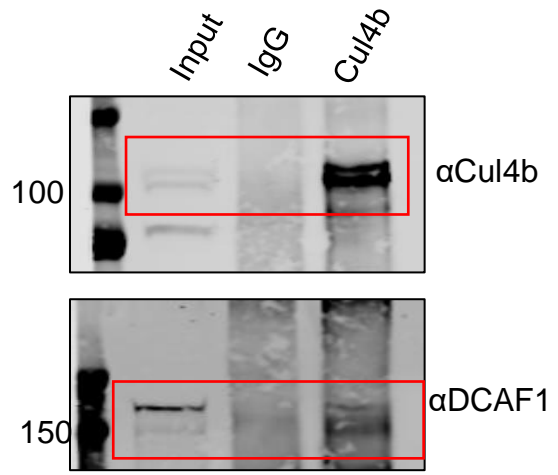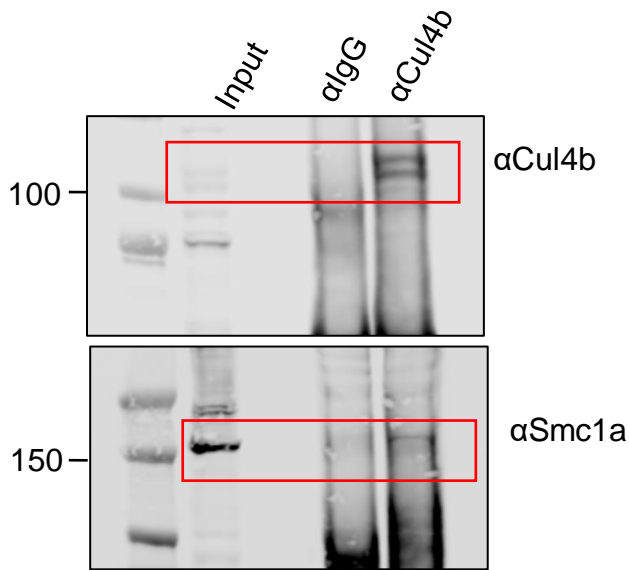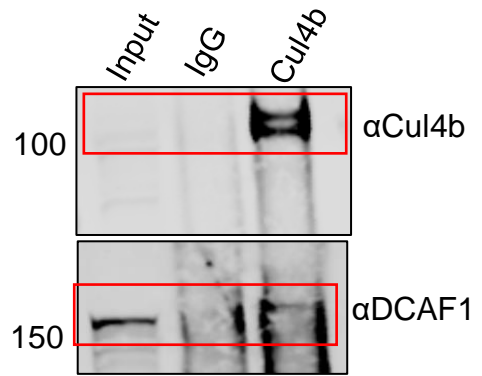

Images were acquired by li-cor odyssey infrared imaging system  
Approx. molecular weight ladder (L) was indicated.

Figure 7C

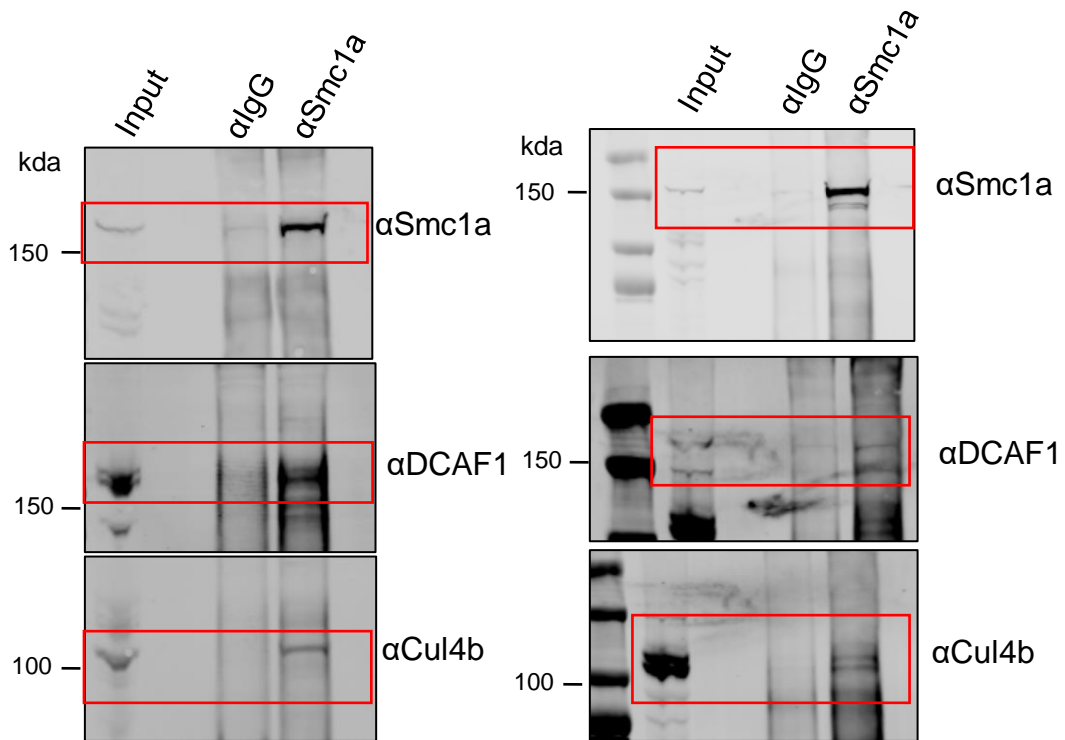

Images were acquired by li-cor odyssey infrared imaging system  
Approx. molecular weight ladder (L) was indicated.
